# Supplementary material
Source: publisher figshare collection journal article supplement (https://acs.figshare.com/ndownloader/files/3801175)
Supplement: Supplementary file 1 [file 3801175]

# Supporting Information

## Decorating CdTe QD-Embedded Mesoporous Silica Nanospheres with Ag NPs to Prevent Bacteria Invasion for Enhanced Anticounterfeit Applications

Yangyang Gao,<sup>†,‡</sup> Qigeqi Dong,<sup>†,§</sup> Shi Lan,<sup>⊥</sup> Qian Cai,<sup>‡</sup> Oudjaniyobi Simalou,<sup>||</sup> Shiqi Zhang,<sup>#</sup> Ge Gao,<sup>Δ</sup> Harnode Chokto,<sup>‡</sup> and Alideertu Dong,<sup>\*,‡</sup>

<sup>‡</sup>College of Chemistry and Chemical Engineering and <sup>§</sup>College of Life Science, Inner Mongolia University, Hohhot 010021, People's Republic of China

<sup>⊥</sup>College of Science, Inner Mongolia Agricultural University, Hohhot 010018, People's Republic of China

<sup>||</sup>Département de Chimie, Faculté Des Sciences (FDS), Université de Lomé (UL), BP 1515 Lome, Togo

<sup>#</sup>PhD School of Matériaux, Mécanics, Environnement, Energy, Process and Production Engineering (I-MEP2), University of Grenoble, Grenoble 38031, France

<sup>Δ</sup>College of Chemistry, Jilin University, Changchun 130021, People's Republic of China

<sup>†</sup>Y.G. and Q.D. contributed equally to this work

## **Synthesis of solid SiO<sub>2</sub> NSs**

Solid silica nanospheres (denoted as SiO<sub>2</sub> NSs) were synthesized according to the well-known stöber method.<sup>S1</sup> 25 ml of TEOS were rapidly added into a mixture of ethanol (40 mL), deionized water (50 mL), and ammonium aqueous solution (28 %, 30 mL). The mixture was then stirred at room temperature for 12 h. The resulting solid SiO<sub>2</sub> NSs were centrifugally separated from the suspension, washed with deionized water and ethanol, and dried in a vacuum.

## **Synthesis of MPA-modified CdTe QDs**

The preparation of 3-mercaptopropionic acid (MPA)-capped CdTe QDs was performed according to previous reports.<sup>S2</sup> In detail, NaHTe solution was added to nitrogen saturated CdCl<sub>2</sub> aqueous solution in the presence of MPA as a stabilizing agent. The ratio of [CdCl<sub>2</sub>]/[MPA]/[NaHTe] was fixed at 2/5/1. The resulting mixture was refluxed at 100 °C for about 1 h to control the growth of the CdTe QDs. Ultimately, MPA modified CdTe QDs were obtained and stored at 4 °C in dark for further use.

## **Synthesis of individually dispersed Ag NPs**

The individually dispersed Ag NPs were prepared with a chemical reduction method.<sup>S3</sup> In brief, ice-cooled sodium borohydride (NaBH<sub>4</sub>, 0.1 mol/L, 60 mL) was added to an aqueous solution containing AgNO<sub>3</sub> (0.1 mol/L, 40 mL) and sodium citrate (0.1 mol/L, 10 mL) under vigorous stirring. After 1 min, the stirring was stopped, and the reaction solution was allowed to stand for 2 h to produce individually dispersed Ag NPs.

## Figures

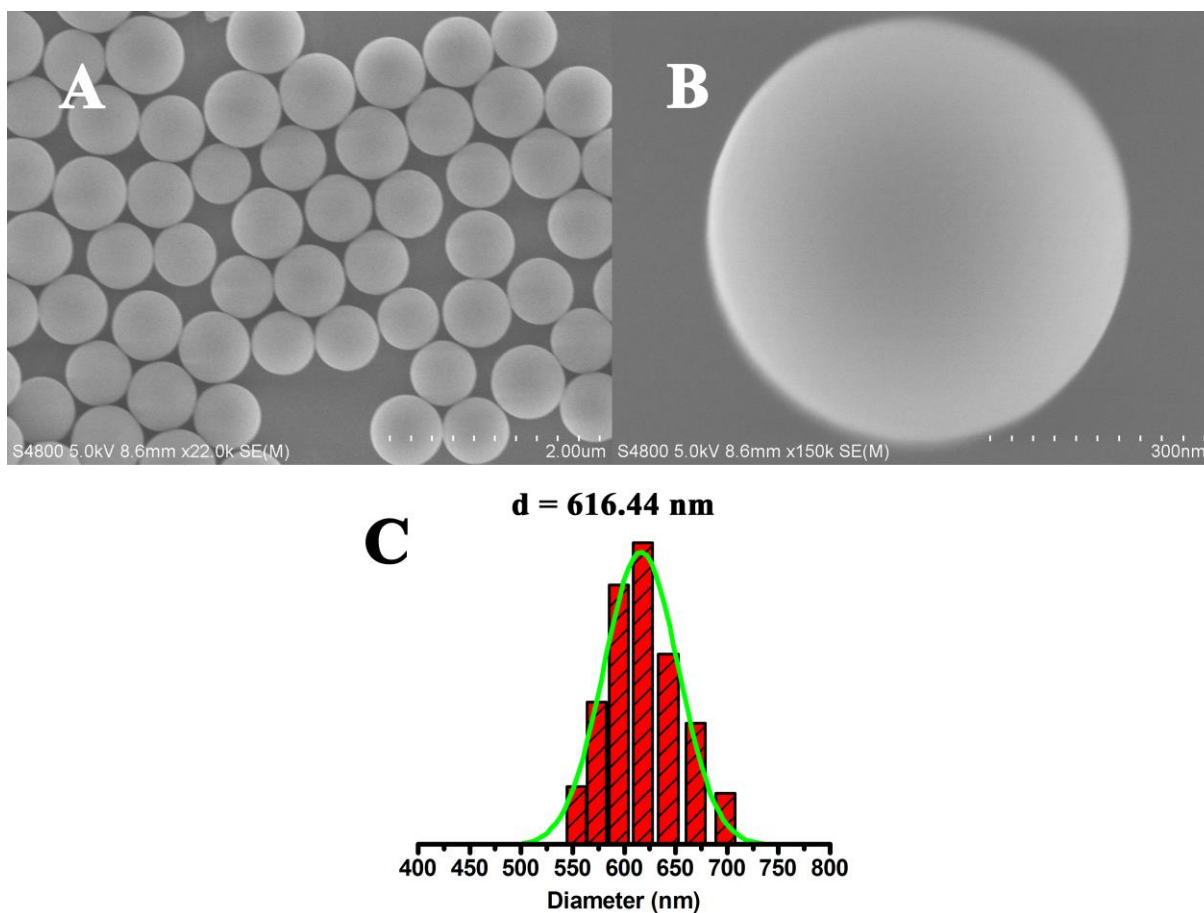

**Figure S1.** SEM images (A and B) and size distribution (C) of solid  $\text{SiO}_2$  NSs.

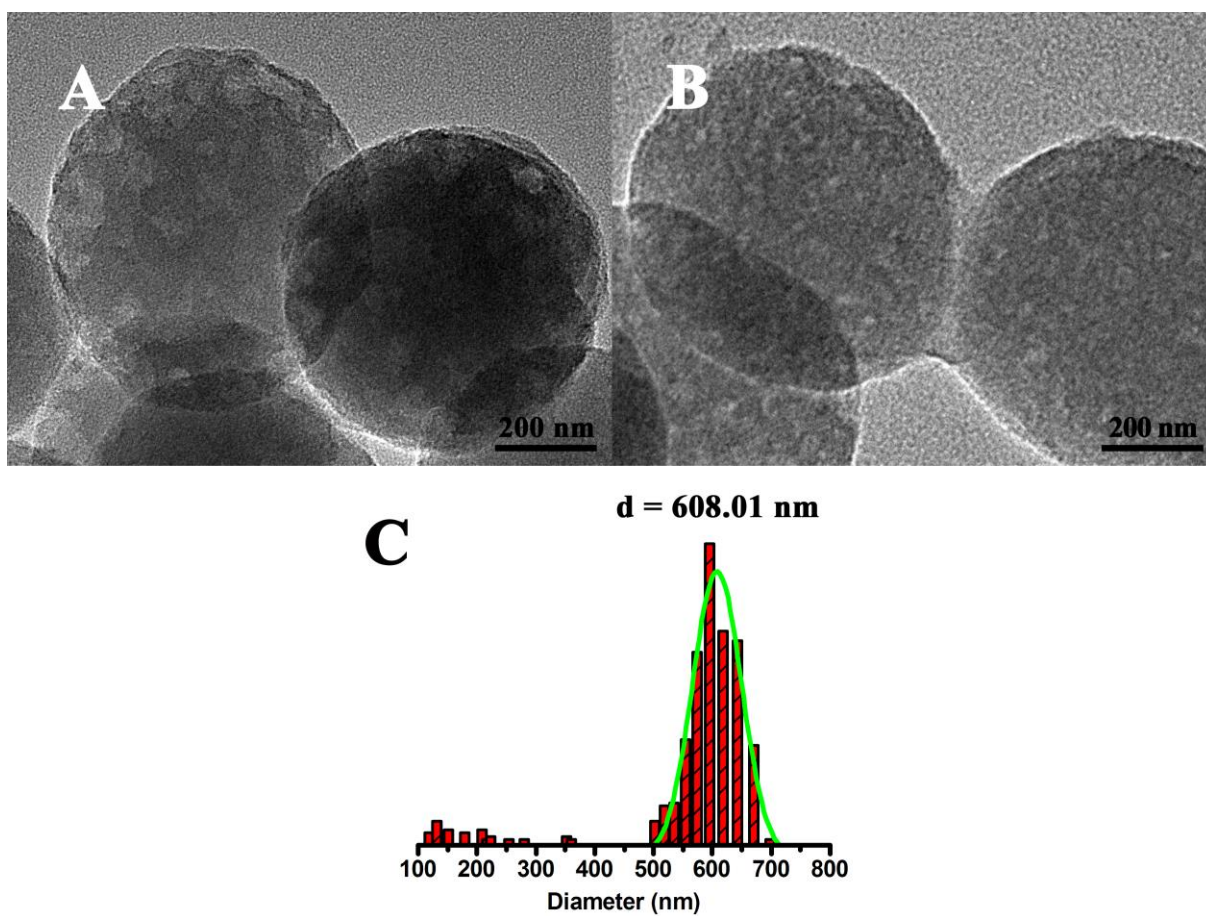

**Figure S2.** TEM images (A and B) and size distribution (C) of m-SiO<sub>2</sub> NSs.

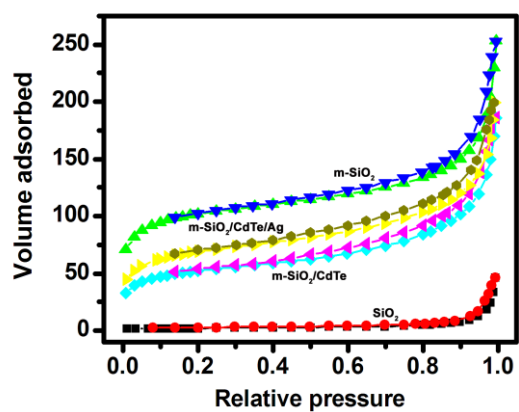

**Figure S3.** Nitrogen adsorption-desorption isotherm of solid SiO<sub>2</sub> NSs, m-SiO<sub>2</sub> NSs, m-SiO<sub>2</sub>/CdTe NSs, and m-SiO<sub>2</sub>/CdTe/Ag NSs.

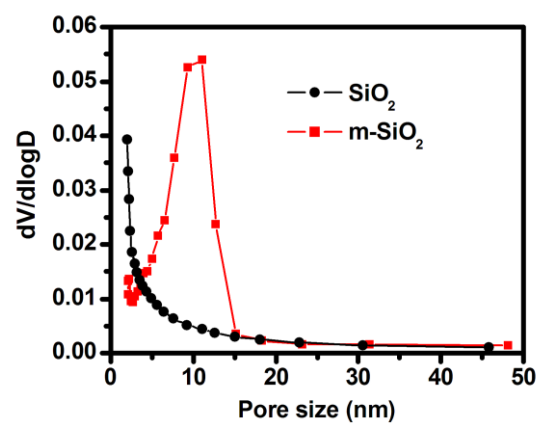

**Figure S4.** BJH pore-size distribution curves of solid  $\text{SiO}_2$  NSs and m- $\text{SiO}_2$  NSs.

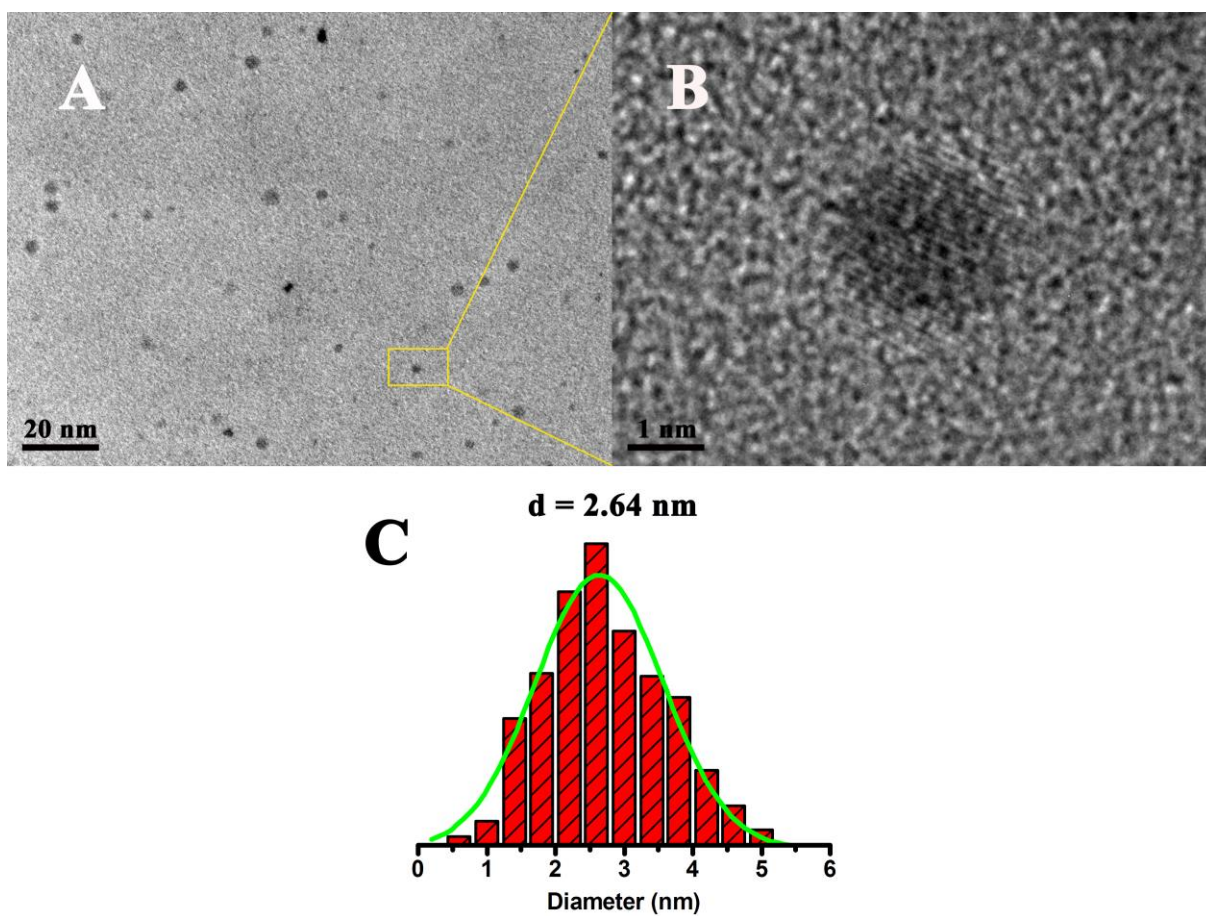

**Figure S5.** TEM image (A), HRTEM image (B), and size distribution (C) of CdTe QDs.

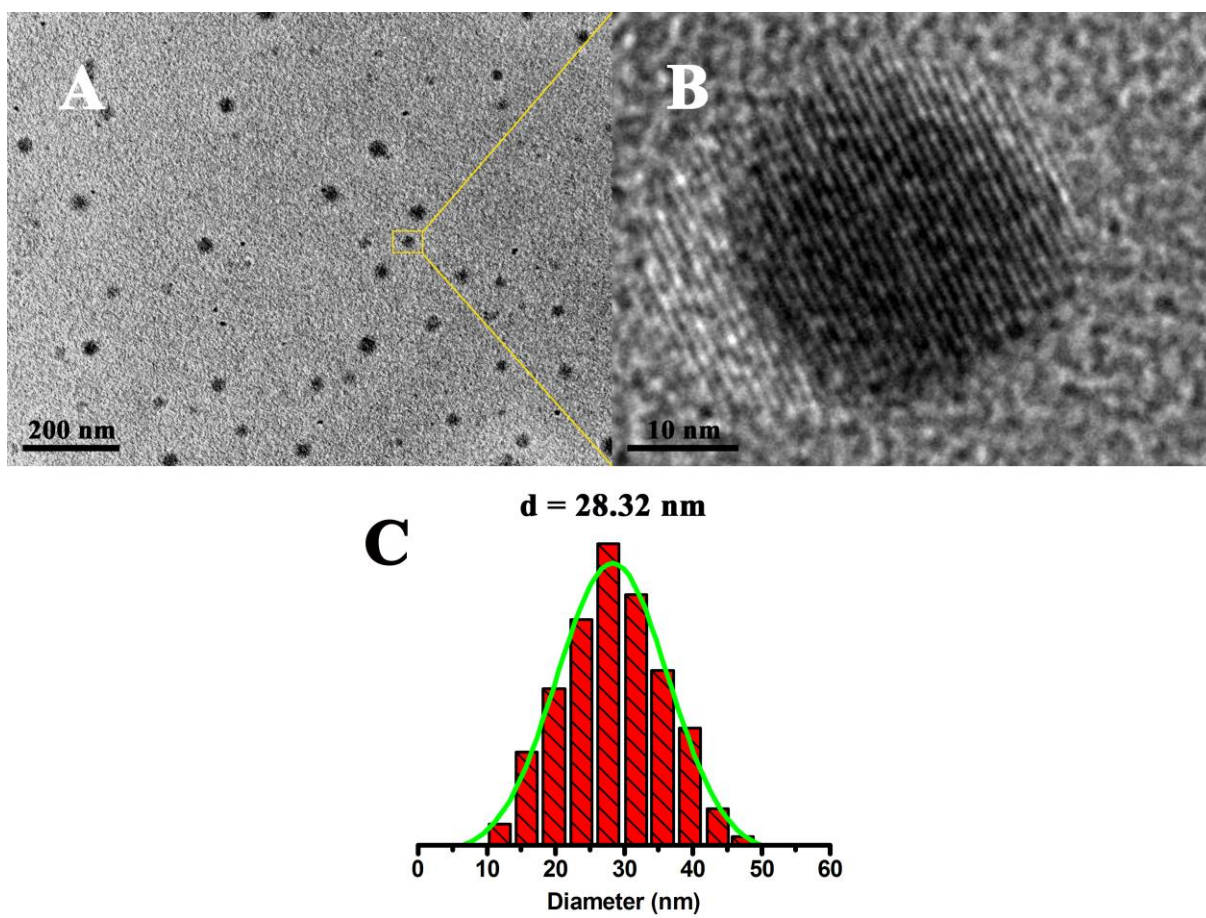

**Figure S6.** TEM image (A), HRTEM image (B), and size distribution (C) of Ag NPs.



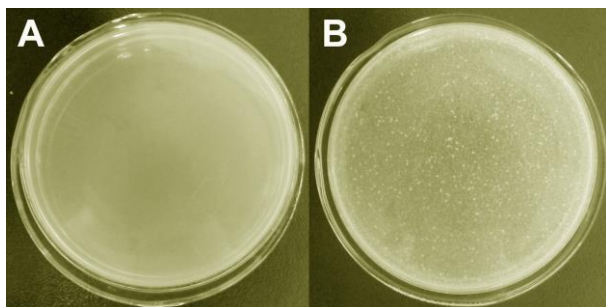

**Figure S7.** Photographs showing the bacterial culture plates of *E. coli* treated with Ag NPs with incubation time of 24 h (A) and 5 days (B).

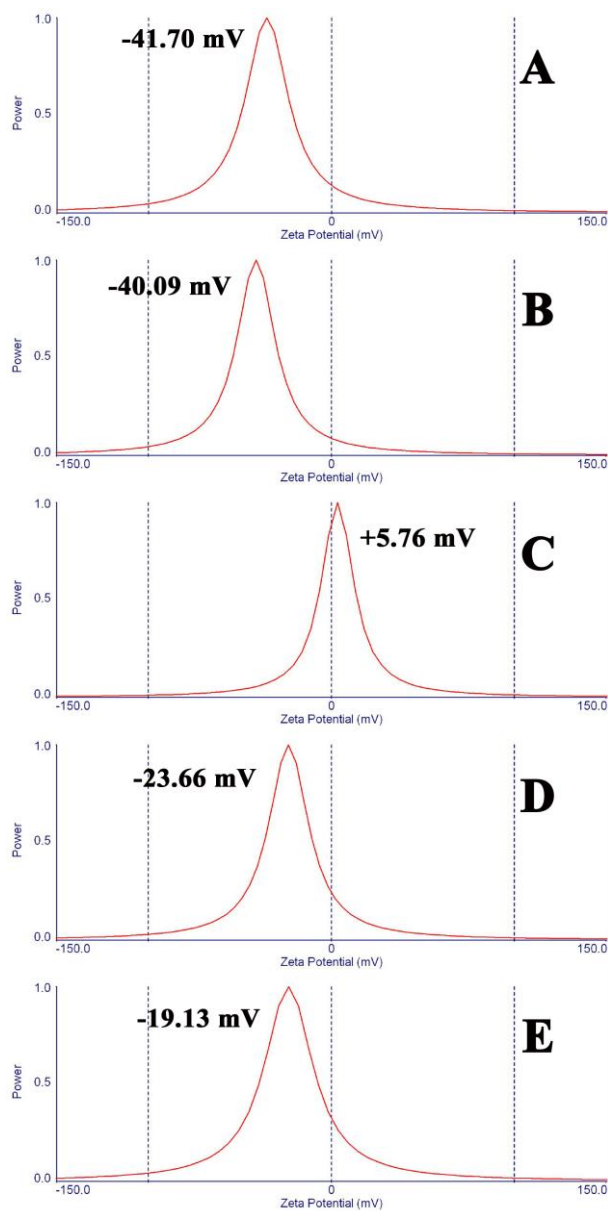

**Figure S8.** Zeta potential of m-SiO<sub>2</sub> NSs (A), CdTe QDs (B), Ag NPs (C), *E. coli* (D), and *S. aureus* (E).

## References

- (S1) Stöber, W.; Fink, A.; Bohn, E. Controlled Growth of Monodisperse Silica Spheres in the Micro Size Range. *J. Colloid Interface Sci.* **1968**, *26*, 62-69.
- (S2) Wang, Y.; He, X.; Li, W.; Zhang, Y. Fabrication of QDs-Silica-Au NCs Ternary Hybrid Sphere-Based Fluorescence Bar codes by a Post-Encoding Method. *J. Mater. Chem. C* **2013**, *1*, 2202-2208.
- (S3) Chen, K.; Pu, Y.; Chang, K.; Liang, Y.; Liu, C.; Yeh, J.; Shih, H.; Hsu, Y. Ag-Nanoparticle-Decorated SiO<sub>2</sub> Nanospheres Exhibiting Remarkable Plasmon-Mediated Photocatalytic Properties. *J. Phys. Chem. C* **2012**, *116*, 19039-19045.
